# Supplementary material for: Mitigating the impact of COVID-19 on tuberculosis and HIV services: A cross-sectional survey of 669 health professionals in 64 low and middle-income countries
Source: PLoS One. 2021 Feb 2;16(2):e0244936. doi: 10.1371/journal.pone.0244936 (PMC7853462; doi:10.1371/journal.pone.0244936)
Supplement: S7 File — (XLSX) [file pone.0244936.s007.xlsx]

## Sheet: 1 complete
Respondent ID	Consent to participate: By clicking the boxes below, I confirm that:					Thank you for your consent. If you provide text answers, do you agree for us to quote your statements (verbatim) in a report without identifying you?	3. What is your age?	4. What is your gender?	5. Which of the following best describes the role you work in?		6. What type of organisation do you work in?		8. Please select whether you would like to answer questions on TB, HIV or both	12. Since COVID-19, what control measures have been implemented by the government and how has this impacted TB health services? (examples: reduced transport, movement restrictions, etc)	15. Have you experienced shortages of medicines or other challenges to provision of standard treatment for TB patients since COVID-19?		16. Has it been harder for TB patients to access non-medical support such as food supplementation or counselling since COVID-19?		17. What do you think can be done (or has already been done) to minimize or avoid disruptions from COVID-19 to TB services?	21. Since COVID-19, what control measures have been implemented by the government and how has this impacted HIV health services? (examples: reduced transport, movement restrictions, etc)	26. What do you think can be done (or has already been done) to minimize or avoid disruptions from COVID-19 to HIV services?	12. Since COVID-19, what control measures have been implemented by the government and how has this impacted TB health services? (examples: reduced transport, movement restrictions, etc)	17. What do you think can be done (or has already been done) to minimize or avoid disruptions from COVID-19 to TB services?	21. Since COVID-19, what control measures have been implemented by the government and how has this impacted HIV health services? (examples: reduced transport, movement restrictions, etc)	26. What do you think can be done (or has already been done) to minimize or avoid disruptions from COVID-19 to HIV services?
	I have agreed to take part in the study	I have seen a copy of the information sheet (available by clicking the link above) that explains my role in this research. I understand its contents and agree to participate in this research.	I can withdraw from the survey at any point in time	I will not have any financial benefits that result from the commercial development of this research	I consent to have the coded data made available for future research by putting it into a data repository	Response	1 "18-24" 2 "25-34" 3 "35-44" 4 "45-54" 5 "55-64" 6 "65+" 7 "prefer not to answer"	1 "female" 2 "male" 3 "prefer not to answer" 0 "self-describe"	1 "Nurse providing care to patients" 2 "Doctor providing care to patients" 3 "Community healthcare worker" 4 "Other healthcare provider" 5 "Manager of healthcare facility or programme" 6 "Researcher" 0 "Other"	Other (please specify)	1 Public sector healthcare facility 2 Private, for-profit healthcare facility 3 Charity/non-profit healthcare facility 4 Government agency 5 Domestic non-governmental organisation 6 International non-governmental organisation 7 Funding agency 8 University or academic body 0= Other (please specify)	Other (please specify)	1= TB 2=HIV 3=Both	Open-Ended Response	1=No - same as before 2=Yes - it is slightly harder to provide TB treatment 3=Yes - it is much harder to provide TB treatment 4= Yes – it is very difficult or impossible to provide TB treatment 5= Don’t know 6=Prefer not to answer	Please use this space to provide more details,	1= No - same as before 2= Yes - it is slightly harder 3= Yes - it is much harder 4= Yes – it is very difficult or impossible 5= Not available in my country, region, or facility 6=Don’t know 7=Prefer not to answer	Please use this space to provide more details	Open-Ended Response	Open-Ended Response	Open-Ended Response	Open-Ended Response	Open-Ended Response	Open-Ended Response	Open-Ended Response
11836880747	1	2	3	4	5	2	1	1	0	Data Entry Operator	7		2							All necessary actions has been taken by the Govt. to protect against COVID-19	All SOP's are good which are prescribed by Govt. it should be followed.
11807299205	1	2	3	4	5	1	4	1	3		2		1	Yes	2	It was difficult for patients to receive medicine because of lockdown	1
11789815863	1	2	3	4	5	1	3	1	3		2		1	In some hospitals screening of New TB patients is not done properly due to this reason there is a fear of rapid increase of TB in coming years.	2		3
11789384046	1	2	3	4	5	1	2	1	3		5		1	Due to lockdown & road blocks	3		3		Use masks & keep social distancing
11786147421	1	2	3	4	5	1	1	1	3		2		1	Fear of covid 19	6		6	No	Awareness in community and define differences in TB and Covid 19
11786107026	1	2	3	4	5	1	2	1	3		5		1	Lockdown, transportation	1		2
11785720306	1	2	3	4	5	1	2	1	3		2		3									Rush areas and wearing masks	Patients test should be free which doctor wrote like ESR, CBC etc.	New team	New team
11737280795	1	2	3	4	5	1	3	1	3		1		1	Thanks	1		1
11733257583	1	2	3	4	5	1	5	1	2		2		1	lockdown,transport problem,shortage of health care provider	3		3		increase the number of health care provider
11730625483	1	2	3	4	5	2	2	1	0	Laboratory Technician	3		1	Local transport Ban	2		1		Medicine may be delivered at home to avoid traveling of patients
11729982116	1	2	3	4	5	1	2	1	3		2		1	Yes	2		2		Beater server
11729692378	1	2	3	4	5	1	1	1	3		2		1	Lockdown	1		1
11729679582	1	2	3	4	5	1	3	2	5		7		1	Yes	4		3		Facilities increas
11729655752	1	2	3	4	5	1	2	1	3		5		1	Yes	2		3
11729639705	1	2	3	4	5	1	3	1	1		2		1	People are afraid from health department	1		3		All TB facilities may kindly be opened
11729622606	1	2	3	4	5	1	1	2	1		1		1	Social distance	3		3
11729615354	1	2	3	4	5	1	3	1	6		5		1	Yes	3		3		Saholiyat
11729610362	1	2	3	4	5	1	2	1	6		2		1	Due to lock down , Non availability of transportations, Peoples movement from one place to others & due to closing of free camps poor people are not getting treatment.	2		2
11729610187	1	2	3	4	5	1	3	1	3		3		1	Unemployement ,	1		3		Health care services , Extend facility to district level and BNU should be operational
11729609308	1	2	3	4	5	1	2	2	4		2		1	yes	2		2
11729381899	1	2	3	4	5	1	3	1	4		5		1	Not free movement	2	Earnig resource are resourced	2		Provision of medicine to patient
11729305675	1	2	3	4	5	2	2	1	0	Lab tech	0	Lab	1	No	1		1		No
11729195077	1	2	3	4	5	1	3	1	4		2		1	Lockdown ki waja se bht masla howa hai	5		2
11729134720	1	2	3	4	5	1	4	1	4		2		1	Tranportation pe pabandi aur lock down ki waja se TB ki Saholiyat mutasir howe hain	1		2		1. Make possible tranportation problem. Publish IEC material related with TB and Corona. Increase in distribution of mask and senitizer for health facilities and TB Patients
11729057763	1	2	3	4	5	1	2	1	3		5		1	Transport lockdown	1		2		Need to eradicate fear of covid 19 is separate deseas from TB and signs of cough does not means it's always covid19.
11728971756	1	2	3	4	5	1	2	1	6		2		1	Lockdown	3		3		Transport arrange
11728951264	1	2	3	4	5	1	2	1	3		2		1	Transport problems	1		2		Provide medicine at time and ppe
11728935186	1	2	3	4	5	1	2	1	5		2		1	Lock down	1		1
11728830435	1	2	3	4	5	1	4	1	2		2		3									Yes true	Necessary steps has been taken	Yes true
11728796784	1	2	3	4	5	1	4	1	4		2		1	Lockdown	2		3		Provde medicne at door step
11728666839	1	2	3	4	5	1	3	1	0	Lab tech.	2		1	Lock down	3		2
11727055932	1	2	3	4	5	1	3	1	0	Microscopist	5		1	yes its true	1		2		Regents or instruments ke lab Tak rasae
11726922831	1	2	3	4	5	1	4	1	3		2		1	Lock down &N/A Transport	3		3		Open Transport
11726860510	1	2	3	4	5	1	2	1	4		3		1	Lock down and closed OPD in hospital	2	OPD closed of hospital due not some problem to deliver medican	2	Due to closed hospital OPD	If lockdown in country to open seprate desk counter for TB patient in ech hospital
11726666015	1	2	3	4	5	1	2	1	3		2		1	close public transpot	2	close public transport	3		open public transport
11726656432	1	2	3	4	5	1	3	1	6		2		1	Limited health care services	1		2		Awareness
11726530936	1	2	3	4	5	1	2	1	4		2		1	Locked down	1		2		Give the awernise through the advertising Radio, TV
11721680548	1	2	3	4	5	1	4	1	3		5		1	Lock down	5		6		Doorstep services
11701555359	1	2	3	4	5	1	3	3	3		2		3									Social distance and lock down		Lock down
11694859329	1	2	3	4	5	1	4	1	5		3		1	Due to movement restrictions & closing of OPDs in hospitals	1	There is no shortage of drugs	5
11693806696	1	2	3	4	5	1	2	1	4		6		1	Transport problem	2		2
11692016681	1	2	3	4	5	1	2	1	5		6		1	transport, hospital entrance	4		3		Communication through national level. Reduce Corona Fear in General Public. Provide full medical facility to all patients, medicine availability
11690970282	1	2	3	4	5	1	1	1	4		6		1	Due to movement restrictions & closing of clinic in the area.	2		2		Provide medicine to patients at their homes.
11688941779	1	2	3	4	5	1	3	1	3		6		1	Transportation	2	Both symptoms are same so there is fear	2		Delivery of medicine to patients at their homes on monthly basis
11688496898	1	2	3	4	5	1	4	1	0	T.B	5		1	Social distance,and almost T.B patients are poor They cannot afford Mask and sanitizer,	1		2	Lab Technicians ignored AFB.They feel threat,and GPS have same feelings.	Increase DFS Mobility,Provide Mask,Sanitizer for +ve Patients
11688461829	1	2	3	4	5	1	1	1	6		2		1	Transport	1	Nill	1	Nill	Nill
11688004299	1	2	3	4	5	1	1	1	0	District field supervisor	6		1	Physical distance, face mask	3		2
11687434118	1	2	3	4	5	1	2	1	3		2		1	Due to knockdown there is lack of transportation and low in come	1		1
11687394673	1	2	3	4	5	1	2	1	6		6		1	Han	2		2		Medicine should be provided to patients.

## Sheet: 2 complete
Respondent ID	Consent to participate: By clicking the boxes below, I confirm that:					Thank you for your consent. If you provide text answers, do you agree for us to quote your statements (verbatim) in a report without identifying you?	3. What is your age?	4. What is your gender?		5. Which of the following best describes the role you work in?		6. What type of organisation do you work in?		8. Please select whether you would like to answer questions on TB, HIV or both	21. Since COVID-19, what control measures have been implemented by the government and how has this impacted HIV health services? (examples: reduced transport, movement restrictions, etc)	26. What do you think can be done (or has already been done) to minimize or avoid disruptions from COVID-19 to HIV services?
	I have agreed to take part in the study	I have seen a copy of the information sheet (available by clicking the link above) that explains my role in this research. I understand its contents and agree to participate in this research.	I can withdraw from the survey at any point in time	I will not have any financial benefits that result from the commercial development of this research	I consent to have the coded data made available for future research by putting it into a data repository	Response	1 "18-24" 2 "25-34" 3 "35-44" 4 "45-54" 5 "55-64" 6 "65+" 7 "prefer not to answer"	1 "female" 2 "male" 3 "prefer not to answer" 0 "self-describe"	Prefer to self describe:	1 "Nurse providing care to patients" 2 "Doctor providing care to patients" 3 "Community healthcare worker" 4 "Other healthcare provider" 5 "Manager of healthcare facility or programme" 6 "Researcher" 0 "Other"	Other (please specify)	1 Public sector healthcare facility 2 Private, for-profit healthcare facility 3 Charity/non-profit healthcare facility 4 Government agency 5 Domestic non-governmental organisation 6 International non-governmental organisation 7 Funding agency 8 University or academic body 0= Other (please specify)	Other (please specify)	1= TB 2=HIV 3=Both	Open-Ended Response	Open-Ended Response
11770159014	1	2	3	4	5	1	3	1		6		8		2	Community closed management was adopted when the epidemic broke out, which affected the regular access to regular services	When the epidemic subsides, medical services should be restored as soon as possible. Strengthen medical management to reduce the risk of infection in the hospital.

## Sheet: 3 complete
Respondent ID	Consent to participate: By clicking the boxes below, I confirm that:					Thank you for your consent. If you provide text answers, do you agree for us to quote your statements (verbatim) in a report without identifying you?	3. What is your age?	4. What is your gender?		5. Which of the following best describes the role you work in?		6. What type of organisation do you work in?		8. Please select whether you would like to answer questions on TB, HIV or both	9. Has it been harder for healthcare providers to come to work at TB healthcare facilities since COVID-19?	10. Has it been harder for TB patients to access TB services since COVID-19?	11. What do you think are the main concerns or barriers for TB patients to access healthcare since COVID-19? (select all that apply)											12. Since COVID-19, what control measures have been implemented by the government and how has this impacted TB health services? (examples: reduced transport, movement restrictions, etc)	13. Since COVID-19, are you aware of any changes to the way TB healthcare facilities are operating? (select all that apply)					14. Have you experienced shortages of diagnostics or other challenges to provision of routine diagnostic services for TB since COVID-19?		15. Have you experienced shortages of medicines or other challenges to provision of standard treatment for TB patients since COVID-19?		16. Has it been harder for TB patients to access non-medical support such as food supplementation or counselling since COVID-19?		17. What do you think can be done (or has already been done) to minimize or avoid disruptions from COVID-19 to TB services?
	I have agreed to take part in the study	I have seen a copy of the information sheet (available by clicking the link above) that explains my role in this research. I understand its contents and agree to participate in this research.	I can withdraw from the survey at any point in time	I will not have any financial benefits that result from the commercial development of this research	I consent to have the coded data made available for future research by putting it into a data repository	Response	1 "18-24" 2 "25-34" 3 "35-44" 4 "45-54" 5 "55-64" 6 "65+" 7 "prefer not to answer"	1 "female" 2 "male" 3 "prefer not to answer" 0 "self-describe"	Prefer to self describe:	1 "Nurse providing care to patients" 2 "Doctor providing care to patients" 3 "Community healthcare worker" 4 "Other healthcare provider" 5 "Manager of healthcare facility or programme" 6 "Researcher" 0 "Other"	Other (please specify)	1 Public sector healthcare facility 2 Private, for-profit healthcare facility 3 Charity/non-profit healthcare facility 4 Government agency 5 Domestic non-governmental organisation 6 International non-governmental organisation 7 Funding agency 8 University or academic body 0= Other (please specify)	Other (please specify)	1= TB 2=HIV 3=Both	1= No - same as before 2=Yes - it is slightly harder 3=Yes - it is much harder 4=Yes – it is very difficult or impossible 5= Don’t know 6= Prefer not to answer	1= No - same as before 2=Yes - it is slightly harder 3=Yes - it is much harder 4=Yes – it is very difficult or impossible 5= Don’t know 6= Prefer not to answer	Physical distancing/lockdown rules	Disruptions to transport	Reduced income/access to money to travel	Fear of getting infected with COVID-19	Closure of health facilities	Healthcare provider shortages	Longer waiting times	Unable to access a face mask	There are NO concerns or barriers for TB patients	Prefer not to answer	Other (please explain below)	Open-Ended Response	No - same as before	Yes – physical distancing protocols for patients	Yes – masks or other protective equipment for healthcare providers	Prefer not to answer/ don't know	Yes - Other, please explain below	1=No - same as before 2=Yes - it is slightly harder to provide diagnostic services 3=Yes - it is much harder to provide diagnostic services 4=Yes – it is very difficult or impossible to provide diagnostic services 5=Don’t know 6=Prefer not to answer	Please use this space to provide more details about what has caused the change	1=No - same as before 2=Yes - it is slightly harder to provide TB treatment 3=Yes - it is much harder to provide TB treatment 4= Yes – it is very difficult or impossible to provide TB treatment 5= Don’t know 6=Prefer not to answer	Please use this space to provide more details,	1= No - same as before 2= Yes - it is slightly harder 3= Yes - it is much harder 4= Yes – it is very difficult or impossible 5= Not available in my country, region, or facility 6=Don’t know 7=Prefer not to answer	Please use this space to provide more details	Open-Ended Response
11697437889	1	2	3	4	5	2	6	1		0	Medical doctor, a Civil Society Organization team member	5		1	2	3	1	2	3				7					Kurangnya akses dan transportasi		2	3			5		5		2		Melaksanakan protokol kesehatan fenģan.disiplin
11686468676	1	2	3	4	5	1
11673621926	1	2	3	4	5	1	5	2		2		1		3
11671568875	1	2	3	4	5	1
11671370257	1	2	3	4	5	1	2	2		0	Lecturer	8		3
11662181670	1	2	3	4	5	1	4	1		0	Public health lecturer	8		3
11657173787	1	2	3	4	5	1	1	2		6		1		2
11654643265	1	2	3	4	5	1	4	1		0	Laboratory Supervisor for Culture DST TB	1		1	1	1				4								PSBB tidak mengurangi akses pasien TB tetapi pasien TB lebih menghindari berkunjung ke RS.		2	3			1		1		1		Mempermudah pengambilan Obat Anti Tuberkulosis sehingga 0asien dapat mengurangi frekuensi berkunjung ke RS

## Sheet: 4 COMPLETE
Respondent ID	Consent to participate: By clicking the boxes below, I confirm that:					Thank you for your consent. If you provide text answers, do you agree for us to quote your statements (verbatim) in a report without identifying you?	3. What is your age?	4. What is your gender?		5. Which of the following best describes the role you work in?		6. What type of organisation do you work in?		8. Please select whether you would like to answer questions on TB, HIV or both	9. Has it been harder for healthcare providers to come to work at TB healthcare facilities since COVID-19?	10. Has it been harder for TB patients to access TB services since COVID-19?	11. What do you think are the main concerns or barriers for TB patients to access healthcare since COVID-19? (select all that apply)											12. Since COVID-19, what control measures have been implemented by the government and how has this impacted TB health services? (examples: reduced transport, movement restrictions, etc)	13. Since COVID-19, are you aware of any changes to the way TB healthcare facilities are operating? (select all that apply)					14. Have you experienced shortages of diagnostics or other challenges to provision of routine diagnostic services for TB since COVID-19?		15. Have you experienced shortages of medicines or other challenges to provision of standard treatment for TB patients since COVID-19?		16. Has it been harder for TB patients to access non-medical support such as food supplementation or counselling since COVID-19?		17. What do you think can be done (or has already been done) to minimize or avoid disruptions from COVID-19 to TB services?	18. Has it been harder for healthcare providers to come to work at HIV healthcare facilities since COVID-19?	19. Has it been harder for HIV patients to access HIV services since COVID-19?	20. What do you think are the main concerns or barriers for HIV patients to access healthcare since COVID -19?
	I have agreed to take part in the study	I have seen a copy of the information sheet (available by clicking the link above) that explains my role in this research. I understand its contents and agree to participate in this research.	I can withdraw from the survey at any point in time	I will not have any financial benefits that result from the commercial development of this research	I consent to have the coded data made available for future research by putting it into a data repository	Response	1 "18-24" 2 "25-34" 3 "35-44" 4 "45-54" 5 "55-64" 6 "65+" 7 "prefer not to answer"	1 "female" 2 "male" 3 "prefer not to answer" 0 "self-describe"	Prefer to self describe:	1 "Nurse providing care to patients" 2 "Doctor providing care to patients" 3 "Community healthcare worker" 4 "Other healthcare provider" 5 "Manager of healthcare facility or programme" 6 "Researcher" 0 "Other"	Other (please specify)	1 Public sector healthcare facility 2 Private, for-profit healthcare facility 3 Charity/non-profit healthcare facility 4 Government agency 5 Domestic non-governmental organisation 6 International non-governmental organisation 7 Funding agency 8 University or academic body 0= Other (please specify)	Other (please specify)	1= TB 2=HIV 3=Both	1= No - same as before 2=Yes - it is slightly harder 3=Yes - it is much harder 4=Yes – it is very difficult or impossible 5= Don’t know 6= Prefer not to answer	1= No - same as before 2=Yes - it is slightly harder 3=Yes - it is much harder 4=Yes – it is very difficult or impossible 5= Don’t know 6= Prefer not to answer	Physical distancing/lockdown rules	Disruptions to transport	Reduced income/access to money to travel	Fear of getting infected with COVID-19	Closure of health facilities	Healthcare provider shortages	Longer waiting times	Unable to access a face mask	There are NO concerns or barriers for TB patients	Prefer not to answer	Other (please explain below)	Open-Ended Response	No - same as before	Yes – physical distancing protocols for patients	Yes – masks or other protective equipment for healthcare providers	Prefer not to answer/ don't know	Yes - Other, please explain below	1=No - same as before 2=Yes - it is slightly harder to provide diagnostic services 3=Yes - it is much harder to provide diagnostic services 4=Yes – it is very difficult or impossible to provide diagnostic services 5=Don’t know 6=Prefer not to answer	Please use this space to provide more details about what has caused the change	1=No - same as before 2=Yes - it is slightly harder to provide TB treatment 3=Yes - it is much harder to provide TB treatment 4= Yes – it is very difficult or impossible to provide TB treatment 5= Don’t know 6=Prefer not to answer	Please use this space to provide more details,	1= No - same as before 2= Yes - it is slightly harder 3= Yes - it is much harder 4= Yes – it is very difficult or impossible 5= Not available in my country, region, or facility 6=Don’t know 7=Prefer not to answer	Please use this space to provide more details	Open-Ended Response	1= No - same as before 2=Yes - it is slightly harder 3=Yes - it is much harder 4=Yes – it is very difficult or impossible 5= Don’t know 6= Prefer not to answer	1= No - same as before 2=Yes - it is slightly harder 3=Yes - it is much harder 4=Yes – it is very difficult or impossible 5= Don’t know 6= Prefer not to answer	Physical distancing/lockdown rules	Disruptions to transport	Reduced income/access to money to travel	Fear of getting infected with COVID-19	Closure of health facilities	Healthcare provider shortages	Longer waiting times
11793177099	1	2	3	4	5	1	3	2		0	Community Organiser	0	LSM	3	1	2	1						7				Limitation of hours and number of patient visits	Restrictions, so the number of visits increases at certain times		2			If the visit is full, they will not receive health services	2		2		3		It is hoped that there will be increased coordination between government and service providers.	1	2	1					6	7
11784939729	1	2	3	4	5	1	2	1		6		8		3	6	6										10		n				4		6		6		7
11697437889	1	2	3	4	5	2	6	1		0	Medical doctor, a Civil Society Organization team member	5		1
11686468676	1	2	3	4	5	1
11673621926	1	2	3	4	5	1	5	2		2		1		3	1	2		2		4							Lack of access to public transportation, improper PPE	mobility restriction, socialization for physical distancing, hand washing, wearing mask. Impact to deliver services: lack of access to transportation, including across cities		2	3			2		1		1		stay at home, wearing mask, hand washing, physical distancing.	1	2		2	3	4
11671568875	1	2	3	4	5	1
11671370257	1	2	3	4	5	1	2	2		0	Lecturer	8		3	2	3	1	2	3	4		6		8				lack of access to transport; healthcare facilities more prioritising COVID-19 than other services		2	3			5		5		2		Not sure	2	2	1	2	3	4		6	7
11662181670	1	2	3	4	5	1	4	1		0	Public health lecturer	8		3
11657173787	1	2	3	4	5	1	1	2		6		1		2
11654643265	1	2	3	4	5	1	4	1		0	Laboratory supervisor for Culture DST TB	1		1
[truncated: 17 more columns]

## Sheet: 5 complete
Respondent ID	Consent to participate: By clicking the boxes below, I confirm that:					Thank you for your consent. If you provide text answers, do you agree for us to quote your statements (verbatim) in a report without identifying you?	3. What is your age?	4. What is your gender?		5. Which of the following best describes the role you work in?		6. What type of organisation do you work in?		8. Please select whether you would like to answer questions on TB, HIV or both	18. Has it been harder for healthcare providers to come to work at HIV healthcare facilities since COVID-19?	19. Has it been harder for HIV patients to access HIV services since COVID-19?	20. What do you think are the main concerns or barriers for HIV patients to access healthcare since COVID -19?											21. Since COVID-19, what control measures have been implemented by the government and how has this impacted HIV health services? (examples: reduced transport, movement restrictions, etc)	23. Have you experienced shortages of diagnostics or other challenges to provision of routine diagnostic services for HIV since COVID-19?		26. What do you think can be done (or has already been done) to minimize or avoid disruptions from COVID-19 to HIV services?
	I have agreed to take part in the study	I have seen a copy of the information sheet (available by clicking the link above) that explains my role in this research. I understand its contents and agree to participate in this research.	I can withdraw from the survey at any point in time	I will not have any financial benefits that result from the commercial development of this research	I consent to have the coded data made available for future research by putting it into a data repository	Response	1 "18-24" 2 "25-34" 3 "35-44" 4 "45-54" 5 "55-64" 6 "65+" 7 "prefer not to answer"	1 "female" 2 "male" 3 "prefer not to answer" 0 "self-describe"	Prefer to self describe:	1 "Nurse providing care to patients" 2 "Doctor providing care to patients" 3 "Community healthcare worker" 4 "Other healthcare provider" 5 "Manager of healthcare facility or programme" 6 "Researcher" 0 "Other"	Other (please specify)	1 Public sector healthcare facility 2 Private, for-profit healthcare facility 3 Charity/non-profit healthcare facility 4 Government agency 5 Domestic non-governmental organisation 6 International non-governmental organisation 7 Funding agency 8 University or academic body 0= Other (please specify)	Other (please specify)	1= TB 2=HIV 3=Both	1= No - same as before 2=Yes - it is slightly harder 3=Yes - it is much harder 4=Yes – it is very difficult or impossible 5= Don’t know 6= Prefer not to answer	1= No - same as before 2=Yes - it is slightly harder 3=Yes - it is much harder 4=Yes – it is very difficult or impossible 5= Don’t know 6= Prefer not to answer	Physical distancing/lockdown rules	Disruptions to transport	Reduced income/access to money to travel	Fear of getting infected with COVID-19	Closure of health facilities	Healthcare provider shortages	Longer waiting times	Unable to access a face mask	There are NO concerns or barriers for HIV patients at this time	Prefer not to answer	Other (please explain below)	Open-Ended Response	1=No - same as before 2=Yes - it is slightly harder to provide diagnostic services 3=Yes - it is much harder to provide diagnostic services 4=Yes – it is very difficult or impossible to provide diagnostic services 5=Don’t know 6=Prefer not to answer	Please use this space to provide more details:	Open-Ended Response
11641769794	1	2	3	4	5	1	5	1		6		0	Non-governmental organisation	2	3	4	1	2		4		6						not being allowed to loiter around, unavailability of protective clothing e.g. PPE will cause the health workers to work with the fear of being infected with the virus, no proper explanations on how treatments can be accessed during the lockdown period	3	PPE, patients not coming when expected for Viral Load testing and to receive counselling	So that patients will be given medications that lasts for at least three months

## Sheet: 6 complete
Respondent ID	Consent to participate: By clicking the boxes below, I confirm that:					Thank you for your consent. If you provide text answers, do you agree for us to quote your statements (verbatim) in a report without identifying you?	3. What is your age?	4. What is your gender?		5. Which of the following best describes the role you work in?		6. What type of organisation do you work in?		8. Please select whether you would like to answer questions on TB, HIV or both	Have you experienced shortages of diagnostics or other challenges to provision of routine diagnostic services for TB since COVID-19?		What do you think can be done (or has already been done) to minimize or avoid disruptions from COVID-19 to TB services?	Since COVID-19, are you aware of any changes to the way HIV healthcare facilities are operating? (select all that apply)					What do you think can be done (or has already been done) to minimize or avoid disruptions from COVID-19 to HIV services?
	I have agreed to take part in the study	I have seen a copy of the information sheet (available by clicking the link above) that explains my role in this research. I understand its contents and agree to participate in this research.	I can withdraw from the survey at any point in time	I will not have any financial benefits that result from the commercial development of this research	I consent to have the coded data made available for future research by putting it into a data repository	Response	1 "18-24" 2 "25-34" 3 "35-44" 4 "45-54" 5 "55-64" 6 "65+" 7 "prefer not to answer"	1 "female" 2 "male" 3 "prefer not to answer" 0 "self-describe"	Prefer to self describe:	1 "Nurse providing care to patients" 2 "Doctor providing care to patients" 3 "Community healthcare worker" 4 "Other healthcare provider" 5 "Manager of healthcare facility or programme" 6 "Researcher" 0 "Other"	Other (please specify)	1 Public sector healthcare facility 2 Private, for-profit healthcare facility 3 Charity/non-profit healthcare facility 4 Government agency 5 Domestic non-governmental organisation 6 International non-governmental organisation 7 Funding agency 8 University or academic body 0= Other (please specify)	Other (please specify)	1= TB 2=HIV 3=Both	Response	Please use this space to provide more details about what has caused the change:	Open-Ended Response	No - same as before	Yes – physical distancing protocols for patients	Yes – masks or other protective equipment for healthcare providers	Prefer not to answer/don't know	Yes- Other	Open-Ended Response
11783788946	1	2	3	4	5	1	2	2		4		2		3	2	fear	Continue with the service as usual.		2			Some of the largest AIDS care centers have been turned into COVID-19 patient camps.	Eliminate fears that AIDS victims may lead to the spread of COVID-19.

## Sheet: 7 
Respondent ID	Consent to participate: By clicking the boxes below, I confirm that:					Thank you for your consent. If you provide text answers, do you agree for us to quote your statements (verbatim) in a report without identifying you?	3. What is your age?	4. What is your gender?		5. Which of the following best describes the role you work in?		6. What type of organisation do you work in?		8. Please select whether you would like to answer questions on TB, HIV or both	Has it been harder for healthcare providers to come to work at TB healthcare facilities since COVID-19?	Has it been harder for TB patients to access TB services since COVID-19?	What do you think are the main concerns or barriers for TB patients to access healthcare since COVID-19? (select all that apply)											Since COVID-19, what control measures have been implemented by the government and how has this impacted TB health services? (examples: reduced transport, movement restrictions, etc)	Since COVID-19, are you aware of any changes to the way TB healthcare facilities are operating? (select all that apply)					Have you experienced shortages of diagnostics or other challenges to provision of routine diagnostic services for TB since COVID-19?		Have you experienced shortages of medicines or other challenges to provision of standard treatment for TB patients since COVID-19?		Has it been harder for TB patients to access non-medical support such as food supplementation or counselling since COVID-19?		What do you think can be done (or has already been done) to minimize or avoid disruptions from COVID-19 to TB services?	Has it been harder for healthcare providers to come to work at HIV healthcare facilities since COVID-19?	Has it been harder for HIV patients to access HIV services since COVID-19?	What do you think are the main concerns or barriers for HIV patients to access healthcare since COVID -19?
	I have agreed to take part in the study	I have seen a copy of the information sheet (available by clicking the link above) that explains my role in this research. I understand its contents and agree to participate in this research.	I can withdraw from the survey at any point in time	I will not have any financial benefits that result from the commercial development of this research	I consent to have the coded data made available for future research by putting it into a data repository	Response	1 "18-24" 2 "25-34" 3 "35-44" 4 "45-54" 5 "55-64" 6 "65+" 7 "prefer not to answer"	1 "female" 2 "male" 3 "prefer not to answer" 0 "self-describe"	Prefer to self describe:	1 "Nurse providing care to patients" 2 "Doctor providing care to patients" 3 "Community healthcare worker" 4 "Other healthcare provider" 5 "Manager of healthcare facility or programme" 6 "Researcher" 0 "Other"	Other (please specify)	1 Public sector healthcare facility 2 Private, for-profit healthcare facility 3 Charity/non-profit healthcare facility 4 Government agency 5 Domestic non-governmental organisation 6 International non-governmental organisation 7 Funding agency 8 University or academic body 0= Other (please specify)	Other (please specify)	1= TB 2=HIV 3=Both	Response	Response	Physical distancing/lockdown rules	Disruptions to transport	Reduced income/access to money to travel	Fear of getting infected with COVID-19	Closure of health facilities	Healthcare provider shortages	Longer waiting times	Unable to access a face mask	There are NO concerns or barriers for TB patients	Prefer not to answer	Other (please specify)	Open-Ended Response	No - same as before	Yes – physical distancing protocols for patients	Yes – masks or other protective equipment for healthcare providers	Prefer not to answer/don't know	Yes- Other. Please explain below	Response	Please use this space to provide more details about what has caused the change:	Response	Please use this space to provide more details	Response	Please use this space to provide more details	Open-Ended Response	Response	Response	Physical distancing/lockdown rules	Disruptions to transport	Reduced income/access to money to travel	Fear of getting infected with COVID-19	Closure of health facilities	Healthcare provider shortages	Longer waiting times
11781360917	1	2	3	4	5	1	5	2		5		4		3	2	1	1			4			7	8				As control measures, there is the restriction of the movement of populations especially during intermittent periods of zonal confinement with curfew, physical distancing in public transport leading to a reduction in the number of passengers to be transported, the wearing of compulsory face masks , hand washing with soap and water and or the use of hydroalcoholic gels or solutions, the closure of …		2	3		Les services minimum instaurés avec alternance des prestataires aux postes de travail dans un contexte où les ressources tant humaines et financières sont insuffisantes, les quelques prestataires qui peuvent encore travailler exigent des primes de motivation qui ne leur sont pas allouées et l'on assiste à un niveau élevé d'absentéisme. Les masques et les EPI pour les prestataires manquent, etc.	2	Dans ma région, le diagnostic de la tuberculose, en 1ère intention, est rendu par le recours au GeneXpert MTB/RIF dont la couverture déjà faible (6/27) a été désorganisé par le déplacement et l'immobilisation en un seul endroit (chef-lieu de la province) de 3 de 6 machines pour la réalisation des tests de Covid-19!	1		1		Comme le pays a opté pour l'utilisation du GeneXpert pour la confirmation de la Covid-19, il serait judicieux d'acheter des automates Xpert à un nombre élevé de modules (16 ou plus) pour améliorer, à la fois, le testing de MTB/RIF et Covid-19 pour l'ensemble de la région. Mais en attendant, les machines déplacées doivent être retournées dans leur site d'implantation et former les usagers locaux a…	2	2	1	2		4			7
11774395088	1	2	3	4	5	1	4	2		5		1		3	1	1		2	3									Reduced transport	1					2	Disruption in air transport	2		1		Supply of inputs in large quantities at the screening and treatment site	1	1		2
11770537147	1	2	3	4	5	1	5	2		2		4		3	1	2	1	2	3	4			7					Restrictions on movement resulting in a reduction of providers in the department causing long waiting times for patients		2	3			1		1		2	insufficient funding for nutritional support	Strengthen infection control measures, Strengthen community involvement in patient monitoring	1	2	1	2	3	4
11765839166	1	2	3	4	5	1	5	2		2		1		3	1	1	1	2	3	4								restriction of movement, absence of transport		2	3			1		1		2	no food supplement	deliver medicines for 3 to 6 months deliver medicines at home	1	1	1	2	3	4
11623111586	1	2	3	4	5	1	4	1		6		8		3	6	6										10		b				4		6		6		7			6	6
11616427278	1	2	3	4	5	1	3	2		5		4		3	2	2		2		4				8				Curfew from 19.00h to 5.00h. Closure of places of worship, bars, restaurants. Cancellation of long-distance bus/coach services. Cancellation of regional bus services. Prohibition of gatherings of more than 50 people. Compulsory wearing of face masks.	1					2		2		1		Availability of treatment sites of a 4-month stock	2	2		2		4
[truncated: 17 more columns]

## Sheet: 8
Respondent ID	Consent to participate: By clicking the boxes below, I confirm that:					Thank you for your consent. If you provide text answers, do you agree for us to quote your statements (verbatim) in a report without identifying you?	3. What is your age?	4. What is your gender?		5. Which of the following best describes the role you work in?		6. What type of organisation do you work in?		8. Please select whether you would like to answer questions on TB, HIV or both	9. Has it been harder for healthcare providers to come to work at TB healthcare facilities since COVID-19?	10. Has it been harder for TB patients to access TB services since COVID-19?	11. What do you think are the main concerns or barriers for TB patients to access healthcare since COVID-19? (select all that apply)											12. Since COVID-19, what control measures have been implemented by the government and how has this impacted TB health services? (examples: reduced transport, movement restrictions, etc)	13. Since COVID-19, are you aware of any changes to the way TB healthcare facilities are operating? (select all that apply)					14. Have you experienced shortages of diagnostics or other challenges to provision of routine diagnostic services for TB since COVID-19?		15. Have you experienced shortages of medicines or other challenges to provision of standard treatment for TB patients since COVID-19?		16. Has it been harder for TB patients to access non-medical support such as food supplementation or counselling since COVID-19?		17. What do you think can be done (or has already been done) to minimize or avoid disruptions from COVID-19 to TB services?
	I have agreed to take part in the study	I have seen a copy of the information sheet (available by clicking the link above) that explains my role in this research. I understand its contents and agree to participate in this research.	I can withdraw from the survey at any point in time	I will not have any financial benefits that result from the commercial development of this research	I consent to have the coded data made available for future research by putting it into a data repository	Response	1 "18-24" 2 "25-34" 3 "35-44" 4 "45-54" 5 "55-64" 6 "65+" 7 "prefer not to answer"	1 "female" 2 "male" 3 "prefer not to answer" 0 "self-describe"	Prefer to self describe:	1 "Nurse providing care to patients" 2 "Doctor providing care to patients" 3 "Community healthcare worker" 4 "Other healthcare provider" 5 "Manager of healthcare facility or programme" 6 "Researcher" 0 "Other"	Other (please specify)	1 Public sector healthcare facility 2 Private, for-profit healthcare facility 3 Charity/non-profit healthcare facility 4 Government agency 5 Domestic non-governmental organisation 6 International non-governmental organisation 7 Funding agency 8 University or academic body 0= Other (please specify)	Other (please specify)	1= TB 2=HIV 3=Both	1= No - same as before 2=Yes - it is slightly harder 3=Yes - it is much harder 4=Yes – it is very difficult or impossible 5= Don’t know 6= Prefer not to answer	1= No - same as before 2=Yes - it is slightly harder 3=Yes - it is much harder 4=Yes – it is very difficult or impossible 5= Don’t know 6= Prefer not to answer	Physical distancing/lockdown rules	Disruptions to transport	Reduced income/access to money to travel	Fear of getting infected with COVID-19	Closure of health facilities	Healthcare provider shortages	Longer waiting times	Unable to access a face mask	There are NO concerns or barriers for TB patients	Prefer not to answer	Other (please explain below)	Open-Ended Response	No - same as before	Yes – physical distancing protocols for patients	Yes – masks or other protective equipment for healthcare providers	Prefer not to answer/ don't know	Yes - Other, please explain below	1=No - same as before 2=Yes - it is slightly harder to provide diagnostic services 3=Yes - it is much harder to provide diagnostic services 4=Yes – it is very difficult or impossible to provide diagnostic services 5=Don’t know 6=Prefer not to answer	Please use this space to provide more details about what has caused the change	1=No - same as before 2=Yes - it is slightly harder to provide TB treatment 3=Yes - it is much harder to provide TB treatment 4= Yes – it is very difficult or impossible to provide TB treatment 5= Don’t know 6=Prefer not to answer	Please use this space to provide more details,	1= No - same as before 2= Yes - it is slightly harder 3= Yes - it is much harder 4= Yes – it is very difficult or impossible 5= Not available in my country, region, or facility 6=Don’t know 7=Prefer not to answer	Please use this space to provide more details	Open-Ended Response
11774753828	1	2	3	4	5	1	4	2		0	Expert consultant MDR-TB	6		1	1	1	1	2		4								Movement restrictions Suspension of transport barrier measures		2	3		integrating activities related to COVID screening into routine tuberculosis control activities	1	the use of GeneXpert devices in the diagnosis of COVID	1	anti-tuberculosis drugs are available during the period of COVID, the only difficulty was access to care structures linked to movement restrictions	1	movement restrictions and the ban on transport were a major obstacle to these activities	integrate COVID activities into routine TB control activities
11774203405	1	2	3	4	5	1	3	2		5		1		1	2	2	1	2		4			7	8			Crante d'être contaminé de la COVID 19	First of all, a minimum service has been established: The staff alternates on duty every day; service meetings are organized for small groups; natural ventilation by the compulsory opening of doors and windows during working hours; the setting up of hand washing points with liquid soap or chorine water at the entrance to the plot of each office and health facility; visits to health facilities are…		2	3		Compliance with all infection control measures (administrative, environmental and individual)	3	La grande difficulté, c'est le retard des approvisionnements suite à tout ce que la COVID 19 a entraîné ce qui a pour corollaire les ruptures enregistrées dans des formation sanitaires	2	Il y a des patients qui ont du attendre pendant beaucoup de jours sans traitement suite à l'indisponibilité des intrants dans le dépôt	1	In our context, nutritional support is only available to MDR TB patients and not to susceptible TB patients. Activity continues despite this pandemic. It is the same for advice for the sick. Nurses / doctors are available in health facilities and before starting treatment, patients receive advice	Bi-annual or annual supplies of all control inputs are needed to health facilities to avoid disruptions; staff must be provided with sufficient quantities of inputs / personal protective equipment as staff are exposed to the greater risk of the symptoms of TB and COVID 19 being similar. Finally, more awareness is needed among staff and patients for the strict observance of barrier measures.
11770548344	1	2	3	4	5	1	4	2		0	Doctor providing technical and financial support to the health program	6		1	3	2	1	2		4		6		8				reduced transport, movement restrictions, compulsory wearing of masks, availability of hand washing stations, social distancing measures.		2	3			1		1		2	Insufficient and delayed funding of non-medical support activities by support partners	Increase funding for tuberculosis control activities, strengthen awareness, regularly supply structures with drugs, reagents, spittoons, slides, Genxpert cartridges and masks (N95 and surgical), support supervision at all levels, strengthen screening at through the various entry points into the healthcare system, intensify research on confirmed cases, support supervision and quarterly monitoring …
11766554675	1	2	3	4	5	1	4	2		5		1		1	2	2	1	2		4			7					closure of internal and external borders (limitation of movements), limitation of movements to less than 20 people, limitation of seats on buses (long waiting line at stops)		2	3			1		1		3		equip all providers with personal protective equipment, set up free first aid for all patients with fever, cough and dyspnea
11683691182	1	2	3	4	5	1	3	2		4		1		1	2	2	1	2		4							quarantine	Cancellation of long-distance transport, quarantine, prohibition of gatherings			3		De	2	No urgent supply because of transport stoppages	2	Redeployment of the programme staff towards the fight against COVID-19. This reduced the efficacy of the monitoring of availability at the operational level	6		Development and implementation of a contingency plan taking into account the priorities.
11647346630	1	2	3	4	5	1	4	2		5		1		1	2	2		2		4								Reduced transport and exclusion zone limiting the movement of sick/ill persons/people		2	3			1		2		1		Anticipatory contingency plan.
11623579864	1	2	3	4	5	1	3	2		0	Health programme supervisor	6		1	1	1		2										Limiting the number of passengers on means of transport, both public and private, has contributed to an increase in transport costs. This causes difficulties for sick/ill persons/people who are already very poor.			3			1		4	There was already a thread of a drugs/medicine shortage from 15 March 2020. The pandemic complicated the process for importing drugs/medicine which was only possible 6 weeks later.	1	No, the existing small programme for this care has been completed within deadline.	Patient care and screening services staff need personal protective equipment. Keep stock of drugs/medicine for patient and involve family members as support.
11616098314	1	2	3	4	5	1	6	1		0	In charge of the health part	6		1	2	3	1	2	3	4								Reduced public transport, half-day skeleton service		2	3			1		1		2		Guarantee patients transportation because these disturbances have affected patients’ treatment follow-up.
11615819246	1	2	3	4	5	1	4	2		5		6		1	2	2	1	2		4								Isolation of the capital from other provinces of the country, social distancing, compulsory wearing of face masks. For our setting (hospital care of complications linked to tuberculosis), the difficulty is the admission of new patients, who must be tested for COVID-19 which causes problems in terms of screening (not always available) and there is no clearly defined pathway for this type of patien…		2	3			2		2	Shortage of some drugs/medicine following national and international isolation measures (deliveries have been much delayed)	3	For outpatients followed within the tuberculosis care system, the food support hasn't been adequate since the start of the COVID-19 pandemic, I don’t know the reasons for this.	A pathway should be created to allow all new TB cases to be tested for COVID-19. The solution would be to site the triage and screening of COVID-19 in TB care settings (care settings could be prioritised according to their size and geographic location to ensure better coverage of a well defined zone), this will reduce contamination risks for existing cases and ease the worries of new TB patients …
11615186111	1	2	3	4	5	1

## Sheet: 9
Respondent ID	Consent to participate: By clicking the boxes below, I confirm that:					Thank you for your consent. If you provide text answers, do you agree for us to quote your statements (verbatim) in a report without identifying you?	3. What is your age?	4. What is your gender?		5. Which of the following best describes the role you work in?		6. What type of organisation do you work in?		8. Please select whether you would like to answer questions on TB, HIV or both	9. Has it been harder for healthcare providers to come to work at TB healthcare facilities since COVID-19?	10. Has it been harder for TB patients to access TB services since COVID-19?	11. What do you think are the main concerns or barriers for TB patients to access healthcare since COVID-19? (select all that apply)											12. Since COVID-19, what control measures have been implemented by the government and how has this impacted TB health services? (examples: reduced transport, movement restrictions, etc)	13. Since COVID-19, are you aware of any changes to the way TB healthcare facilities are operating? (select all that apply)					14. Have you experienced shortages of diagnostics or other challenges to provision of routine diagnostic services for TB since COVID-19?		15. Have you experienced shortages of medicines or other challenges to provision of standard treatment for TB patients since COVID-19?		16. Has it been harder for TB patients to access non-medical support such as food supplementation or counselling since COVID-19?		17. What do you think can be done (or has already been done) to minimize or avoid disruptions from COVID-19 to TB services?
	I have agreed to take part in the study	I have seen a copy of the information sheet (available by clicking the link above) that explains my role in this research. I understand its contents and agree to participate in this research.	I can withdraw from the survey at any point in time	I will not have any financial benefits that result from the commercial development of this research	I consent to have the coded data made available for future research by putting it into a data repository	Response	1 "18-24" 2 "25-34" 3 "35-44" 4 "45-54" 5 "55-64" 6 "65+" 7 "prefer not to answer"	1 "female" 2 "male" 3 "prefer not to answer" 0 "self-describe"	Prefer to self describe:	1 "Nurse providing care to patients" 2 "Doctor providing care to patients" 3 "Community healthcare worker" 4 "Other healthcare provider" 5 "Manager of healthcare facility or programme" 6 "Researcher" 0 "Other"	Other (please specify)	1 Public sector healthcare facility 2 Private, for-profit healthcare facility 3 Charity/non-profit healthcare facility 4 Government agency 5 Domestic non-governmental organisation 6 International non-governmental organisation 7 Funding agency 8 University or academic body 0= Other (please specify)	Other (please specify)	1= TB 2=HIV 3=Both	1= No - same as before 2=Yes - it is slightly harder 3=Yes - it is much harder 4=Yes – it is very difficult or impossible 5= Don’t know 6= Prefer not to answer	1= No - same as before 2=Yes - it is slightly harder 3=Yes - it is much harder 4=Yes – it is very difficult or impossible 5= Don’t know 6= Prefer not to answer	Physical distancing/lockdown rules	Disruptions to transport	Reduced income/access to money to travel	Fear of getting infected with COVID-19	Closure of health facilities	Healthcare provider shortages	Longer waiting times	Unable to access a face mask	There are NO concerns or barriers for TB patients	Prefer not to answer	Other (please explain below)	Open-Ended Response	No - same as before	Yes – physical distancing protocols for patients	Yes – masks or other protective equipment for healthcare providers	Prefer not to answer/ don't know	Yes - Other, please explain below	1=No - same as before 2=Yes - it is slightly harder to provide diagnostic services 3=Yes - it is much harder to provide diagnostic services 4=Yes – it is very difficult or impossible to provide diagnostic services 5=Don’t know 6=Prefer not to answer	Please use this space to provide more details about what has caused the change	1=No - same as before 2=Yes - it is slightly harder to provide TB treatment 3=Yes - it is much harder to provide TB treatment 4= Yes – it is very difficult or impossible to provide TB treatment 5= Don’t know 6=Prefer not to answer	Please use this space to provide more details,	1= No - same as before 2= Yes - it is slightly harder 3= Yes - it is much harder 4= Yes – it is very difficult or impossible 5= Not available in my country, region, or facility 6=Don’t know 7=Prefer not to answer	Please use this space to provide more details	Open-Ended Response
11864003840	1	2	3	4	5	1	4	1		2		1		1	1	3	2	3	4	5								Desde el inicio de la pandemia los pacientes con TB no han podido trasladarse a los centros de alta complejidad por la dificultad en el acceso al transporte publico, por su prohibición de uso para no esenciales por parte del gobierno. From the start of the pandemic, TB patients have not been able to travel to the high complexity centres due to the difficulty in accessing public transport, because…		2				1		1		2		Es muy importante que los centros locales de la red de TB continúen funcionando, para que los pacientes que no pueden acceder a los centros de 3er nivel, puedan retirar la medicación del centro local barrial y no abandone el tratamiento. It is very important that the TB network's local centres continue to operate so that patients who can not access the third level centres can withdraw their medic…
11863378334	1	2	3	4	5	1	4	1		2		1		1	1	2	2	3		5			8					Reduction of transportation, scheduled shifts		2				1		1		2		Comunicación fluida con los pacientes, tratamiento supervisado. Fluent communication withg patients, supervised treatment.
11863216763	1	2	3	4	5	1	3	1		2		1		1	1	4	2	3	4		6							Hay reducción de transportes y restricciones para la movilización y la posibilidad de pasar a otra jurisdicción para conseguir la medicación es casi imposible por eso hay mucho abandono de tratamiento. Reduction in transports and restrictions in mobility and moving to a different jurisdiction to obtain the medication is almost impossible therefore treatment if often discontinued.			3			1		1		3		Que se mejoren los permisos para circular y los pacientes puedan acceder fácilmente al hospital. Improvement in the circulation permits so that patients can easily access hospitals.
11833503745	1	2	3	4	5	1	5	1		5		4		1	2	2			4	5								Restricción de movilidad. Permisos para la circulación personal esencial y exeptuados. Mobility restrictions. Circulation permits for essential personnel and certain exceptions.		2	3			2	Personal abocado a Covid, dificultad en logística de traslaod de muestras. COVID-related personnel, logistical challenges in samples transportation.	1		2		fortalecer apoyo y controles a distancia todas las vías posibles. reforzar entrega de medicación. Strengthen support and remote controls by all possible means. Reinforce medication dispensation.
11747128106	1	2	3	4	5	2	4	2		6		8		1	3	3				5	6							Restricciones en el transporte publico al 50% de su capacidad. Retomo de actividades en centros de salud que tengan condiciones para evitar contagio con Covid Public transport restricted to 50% use of its capacity. Activities restarted at health centres with the means to avoid the spread of COVID.					Varios centros dejaron de funcionar por no tener recursos para protección del personal de salud y de pacientes Several centres stopped operating due to not having the required resources to protect healthcare professionals and patients.	3	Básicamente hay menos laboratorios para el diagnostico y los laboratorios que si procesan lo hacen en forma reducida por poco personal existente para esa labor.Muchos estan en cuarentena y otros se han contaminado de Covid. Basically there are less laboratories performing diagnosis and those which do process it, do it in a reduced format due to the low availability of personnel dedicated to this …	5		3	Mayormente los esfuerzos están mas enfocados a los pacientes Covid. Efforts are mainly focused on COVID patients.	Actualmente algunos servicios ya están retomando actividades y con las medidas de protección, se espera que para Julio gradualmente se reinicien actividades pero ahora normalizacion en forma lenta. Currently some services are already restarting activities and, with protection measures, it is expected that other activities will be restarted by July but for now normalization is slow.
11691701496	1	2	3	4	5	1	4	2		2		1		1	2	2	2	3	4	5	6		8					Reducción de transporte, confinamiento, reducción de de consulta externa Reduction in transport, confinement, reduction in outpatient consultations.		2	3			2		1		3		Información al mismo personal de salud, sobre modosbde protección, dotar de epp apropiado al personal de salud, zonas de atención más amplias y mejor ventiladas, Information to healthcare personnel about protection means, providing the healthcare workers with the appropriate epp, larger and better ventilated consulting areas
11652490013	1	2	3	4	5	1	3	1		2		1		1	3	3	2	3	4	5	6	7	8		10			Reducción del transporte, cierre de servicios de atención primaria Reduction in transport, closure of primary care faciilities		2				2		2		3		Abrir los centros de atención primaria y asegurar el suministro de medicación anti-TB. Open the primary health care centres and ensure the provision of anti-TB medication.
11644554832	1	2	3	4	5	1	4	1		0	Médica en Laboratorio Nacional de Referencia	4		1	2	2	2	3	4	5	6							Se han cerrado muchos centros de atención de primer nivel de salud , los trabajadores de la salud hasta el 1 de junio estamos concurriendo el 50 % del tiempo de trabajo y se atiende por teléfono , se han suspendido las consultas excepto las urgencias y emergencias . Many first level healthcare centres have been closed, healthcare workers as of 1st June are attending work at around 50% of the time…		2	3			3	En Uruguay se suspendió por decisión del programa la búsqueda activa de casos, es decir se está realizando diagnóstico en los sintomáticos respiratorios y contactos . Se suspendió la pesquiza, lo cual disminuye el número de muestras que se estudian a la mitad. In Uruguay the program decided to suspend the active search for cases, so diagnosis is being carried out in patients with respiratory symp…	1		2	Las policlínicas y centros de salud del primer nivel de atención cerraron y ahora que abrieron atienden a un número reducido de personas para mantener el aislamiento , hay que concurrir con cita previa. Policlinics and primary healthcare centres closed and now that they have reopened they see a reduced number of people to manitain isolation. Prior booking of appointment is required.	Utilizar los recursos humanos que están ociosos , ya que estamos trabajando la mitad del personal. Use the available human resources as we are working at half the personnel capacity.
11637176853	1	2	3	4	5	1	3	1		6		8		1	3	3		3		5	6							reduccion transporte. Reduction in transport.			3			3		2		2
11618541353	1	2	3	4	5	1	4	1		2		1		1	1	3	2											Reducción de transporte restricciones en los servicios de atención a pacientes confinamiento. Reduction in transport, restrictions in the care services for confined patients.				4		1		1		6		Los servicios de Tb deben funcionar normalmente. TB services should work normally.
11618416602	1	2	3	4	5	1	4	1		2		1		1	2	3		3	4	5								restricción en la movilidad . Aunque muchos pudieron acceder a permisos especiales, proporcionados por el gobierno o por el centro asistencial, no todos lo han tramitado. Restrictions to mobility. Although many were able to obtain special permits provided by the government or the healthcare centre, not everyone has processed it.		2	3		La entrega de medicación se hace por un tiempo más prolongado para disminuir los desplazamientos de los pacientes. Se realiza en lo posible atención espontanea, sin turno, para evitar desplazamientos ulteriores. Se realizan comunicaciones telefónicas para informar resultados o preguntar evolución. Medication is supplied for a longer period to decrease travel for patients. Spontaneous attention, w…	1		1	mi centro asistencial no ha tenido problemas de abastecimiento de medicación. Pero hemos recibido pacientes del sector privado que han tenido problemas para recibir medicación. My healthcare centre had no medication supply problems. But we have received patients from the private sector who have struggled to obtain their medication.	2	La atención psicológica se vió afectada. Psychological care was affected.	Nuestro centro asistencial ha entregado medicación por más cantidad de tiempo, se han realizado llamados telefónocos para evaluar la evolución, se informaron resultados de laboratorio telefónicamente, se atiende sin turno, se derivan pacientesa centros de salud más cercanos de su domicilio. Our healthcare centre has provided medication lasting for longer, has carried out phone calls to evaluate p…
11615480649	1	2	3	4	5	1	3	1		2		1		1
11614259018	1	2	3	4	5	1	3	1		5		1		1	4	3	2	3	4		6		8					Cierre de unidades de atención médica, restricciones de movilidsd. Closure of medical care units, mobility restrictions.		2	3			3		2		2		Modelos de atención en su domicilio o a distancia con uso de redes sociales. Home care models or distance care through use of social networks.
11613252040	1	2	3	4	5	1	5	1		5		1		1	2	2	2	3	4	5				9				Aislamiento social y con énfasis en personas vulnerables: mayores de 60 años, personas con DM, HTA, VIH. Social isolation with particular emphasis on the most vulnerable; over 60s, DM, Hypertensive or HIV patients.		2	3		Algunas unidades de salud se conviertieron en Unidades Covid-19. Some healthcare units were turned into COVID-19 units.	2	Existe mayor atraso en los métodos diagnósticos de Tb, ya que el personal de salud está en apoyo a la detección de COVID-19. There is a bigger delay in TB diagnostic methods as healthcare personnel are providing support against COVID-19.	1	En México no tenemos problemas de disponibilidad de medicamentos para la atención de la TB. There are no issues regarding the availability of TB drugs in Mexico.	2	Se ha orientado a los familiares para que ellos apoyen en la verificacióin de la ingesta de los fármacos, a fin de evitar que acudan las personas afectadas con TB a las unidades de salud y esperen mayor tiempo. Se orientó para que acudan con cita a las unidades de salud para revisión clínica mensual. Family members have been trained so they can verify that medication is being taken as needed, to …	Se orientó a los familiares de las personas en tratamiento de Tb, de la importancia de no suspender el tratamiento y la importancia de verificar la ingesta de los fármacos, la identificación de las reacciones adversas y la asisitencia a la unidad de salud, con cita, para revisión clínica mensual o si presenta alguna reacción adversa. Family members of patients on TB medication were advised not to…

## Sheet: 10
Respondent ID	Consent to participate: By clicking the boxes below, I confirm that:					Thank you for your consent. If you provide text answers, do you agree for us to quote your statements (verbatim) in a report without identifying you?	3. What is your age?	4. What is your gender?		5. Which of the following best describes the role you work in?		6. What type of organisation do you work in?		8. Please select whether you would like to answer questions on TB, HIV or both	18. Has it been harder for healthcare providers to come to work at HIV healthcare facilities since COVID-19?	19. Has it been harder for HIV patients to access HIV services since COVID-19?	20. What do you think are the main concerns or barriers for HIV patients to access healthcare since COVID -19?											21. Since COVID-19, what control measures have been implemented by the government and how has this impacted HIV health services? (examples: reduced transport, movement restrictions, etc)	22. Since COVID-19, are you aware of any changes to the way HIV healthcare facilities are operating? (select all that apply)					23. Have you experienced shortages of diagnostics or other challenges to provision of routine diagnostic services for HIV since COVID-19?		24. Have you experienced shortages of medicines or other challenges to provision of standard treatment for HIV patients since COVID-19?		25. Has it been harder for HIV patients to access non-medical support such as food supplementation or counselling since COVID-19?		26. What do you think can be done (or has already been done) to minimize or avoid disruptions from COVID-19 to HIV services?
	I have agreed to take part in the study	I have seen a copy of the information sheet (available by clicking the link above) that explains my role in this research. I understand its contents and agree to participate in this research.	I can withdraw from the survey at any point in time	I will not have any financial benefits that result from the commercial development of this research	I consent to have the coded data made available for future research by putting it into a data repository	Response	1 "18-24" 2 "25-34" 3 "35-44" 4 "45-54" 5 "55-64" 6 "65+" 7 "prefer not to answer"	1 "female" 2 "male" 3 "prefer not to answer" 0 "self-describe"	Prefer to self describe:	1 "Nurse providing care to patients" 2 "Doctor providing care to patients" 3 "Community healthcare worker" 4 "Other healthcare provider" 5 "Manager of healthcare facility or programme" 6 "Researcher" 0 "Other"	Other (please specify)	1 Public sector healthcare facility 2 Private, for-profit healthcare facility 3 Charity/non-profit healthcare facility 4 Government agency 5 Domestic non-governmental organisation 6 International non-governmental organisation 7 Funding agency 8 University or academic body 0= Other (please specify)	Other (please specify)	1= TB 2=HIV 3=Both	1= No - same as before 2=Yes - it is slightly harder 3=Yes - it is much harder 4=Yes – it is very difficult or impossible 5= Don’t know 6= Prefer not to answer	1= No - same as before 2=Yes - it is slightly harder 3=Yes - it is much harder 4=Yes – it is very difficult or impossible 5= Don’t know 6= Prefer not to answer	Physical distancing/lockdown rules	Disruptions to transport	Reduced income/access to money to travel	Fear of getting infected with COVID-19	Closure of health facilities	Healthcare provider shortages	Longer waiting times	Unable to access a face mask	There are NO concerns or barriers for HIV patients at this time	Prefer not to answer	Other (please explain below)	Open-Ended Response	No - same as before	Yes – physical distancing protocols for patients	Yes – masks or other protective equipment for healthcare providers	Prefer not to answer/ don't know	Yes- Other (please explain below)	1=No - same as before 2=Yes - it is slightly harder to provide diagnostic services 3=Yes - it is much harder to provide diagnostic services 4=Yes – it is very difficult or impossible to provide diagnostic services 5=Don’t know 6=Prefer not to answer	Please use this space to provide more details:	1=No - same as before 2=Yes - it is slightly harder to provide HIV treatment 3=Yes - it is much harder to provide HIV treatment 4= Yes – it is very difficult or impossible to provide HIV treatment 5= Don’t know 6=Prefer not to answer	Please use this space to provide more details:	1= No - same as before 2= Yes - it is slightly harder 3= Yes - it is much harder 4= Yes – it is very difficult or impossible 5= Not available in my country, region, or facility 6=Don’t know 7=Prefer not to answer	Please use this space to provide more details	Open-Ended Response
11864678264	1	2	3	4	5	1	2	1		2		1		2	3	3	1	2	3	4	5	6									3			4	Desde el inicio de la pandemia se suspendió la provisión de cargas virales y CD4. From the start of the pandemic, the provision of viral loads and CD4 values was suspended	2		3		Enviar la medicación al domicilio del paciente en aquellos que viven en ciudades aledañas. Send medication to the patients' home for those who live in nearby cities.
11863953332	1	2	3	4	5	1	5	1		5		1		2	2	2	1	2	3	4								Confinamiento, restricción de transporte no han impactado en los servicios de salud en si porque el personal de salud es esencial y no es alcanzado por esta medida. Por lo tanto en los servicios no ha impactado. Si impactó en los pacientes que no podían acceder a sus controles habituales. Con lo cual se Plantearon y llevaron a cabo estrategias para que accedan a sus tratamientos antiretrovirales(…		2	3			2	Los servicios de segundo nivel de atención 3er nivel sólo han atendido urgencias lo que dificulta el acceso a tests voluntarios de VIH, es decir los screening. Sin embargo en la provincia donde resido, la confirmación diagnóstica (Virologia)no ha sufrido problemas porque no se ha visto postergada ni suspendida. Second level care services (3rd level) have only dealt with emergencies which has hamp…	1	The TAR suffered no problems or restrictions. It has been sustained despite the pandemic.	2	There is difficulty with hospitals that have seen their number of specialist doctors decrease, OR due to organizational changes in relation to the fact that these hospitals have centralized care in COVID. Food support was sought with the ministry of social development through soup kitchens to find their daily meals.	Se entrega los antiretrovirales en domicilio para evitar exposición de pacientes en los hospitales COVID. Para acceso a controles se puso línea telefónica para acceso a consultas y por telemedicina. En el programa se accede a test voluntario sin turnos en forma diaria y se realiza confirmación diagnóstica. Antiretrovirals are handed out at home to avoid patient exposure at COVID hospitals. For co…
11863439100	1	2	3	4	5	1	5	2		2		1		2	1	2	1	2		4	5							Aislamiento preventivo, restricción del transporte público, menos tiempo para la atención ambulatoria. Preventive isolation, public transport restrictions, reduceed time for outpatient care.		2	3			1		1		2		Improve or increase consultation by remote means
11863257948	1	2	3	4	5	1	3	1		2		2		2	3	3	1	2		4	5							Transporte público solo para trabajadores esenciales. Permiso para circular en casi de control médico. Algunos centros de atención cerrados o con menos disponibilidad de consultas. Public transport only for essential workers. Permision to circulate foor medical controls. Closure of some healthcare centres or less availability of outpatient surgeries.		2	3			2		1		6		Fluid communication, follow-up, indications with patients by whats app
11863247950	1	2	3	4	5	1	3	2		2		2		2	1	3	1	2	3	4								Transportation restriction		2	3			1		1		1		Determine specific "clean" areas for monitoring HIV + patients
11863226939	1	2	3	4	5	1	2	1		2		3		2	3	3		2	3	4	5							reduccion del transporte, movilidad solo para trabajadores esenciales con requerimiento de permisos, limitacion de la autorizacion de prestaciones por obras sociales, falta de flexibilizacion de farmacias para entrega de medicacion. Transport reductions. Mobility limited to essential workers with requirement of permissions, limitation of the authorization of tasks for social enterprises, lack of …		2	3			3	servicios cerrados por enfermedad de los integrantes de los equipos, suspension de determinaciones de la laboratorio considerardas no urgentes durante periodos prolongados de tiempo. Closure of services due to illness of team members, suspension of laboratory tests considered not urgent during prolonged time periods.	1		3	Telemedicine and electronic means are not available in all health centers, and there is no access to these devices for the entire population	Entrenar al personal Abastecer a los servicios de servicios tecnologicos minimizando el uso de papel Contratar personal capacitado para llevar a cabo determinaciones habituales en pacientes HIV Establecer mecanismos fluidos de comunicacion de resultados y entrega de ordenes dentro de las instituciones de salud. Train personnel. Supply services with technological means minimizing the use of paper.…
11863173880	1	2	3	4	5	1	3	1		6		5		2	2	3	1	2	3	4	5	6	7					Restricciones de movilidad aunque las personas con enfermedades cronicas deberían poder ir a retirar su medicación. Sin embargo hay miedos de ir a hospitales y tomar transporte público y muchos no tienen medios para ir por otra vía. Mobility restrictions although people with chronic illnesses should be able to go and collect their medication. However their is a level of fear about going to hospit…		2	3		No hay atención regular en el medio público, dificultad para hacer los controles de rutina tanto de laboratorio como médicos. There is no regular attention within the public media, struggling to conduct both the laboratoty and medical routine tests.	3		2		3		Mejorar la información en cuanto a los permisos de circulación. Para los controles, en la situación actual es muy dificil pero hay que comenzar a considerarlo dados los tiempos. Improve the information supply regarding circulation permits. For controls this is very difficult within the present situation but it should be considered ASAP due to the timelines.
11863170056	1	2	3	4	5	1	2	1		2		1		2	3	3	1	2	3	4	5		7					Transportation reduction		2			Menor cantidad de pacientes atendidos al día en consultorio externo. Smaller number of patients seen each day in the outpatient consultations.	3		3		3		Asignar personal para que se ocupe exclusivamente del control de los pacientes VIH. Assign personnel to take care exclusively of HIV patients.
11853468956	1	2	3	4	5	1	3	2		2		2		2	1	2				4	5		7					Restricciones de movilidad entre ciudades ha impedido acceder a servicios de salud específicos. Mobility restrictions between cities has hampered access to specific health services.		2	3		telemedicine	1		1		1		Adaptación de los servicios de salud en sus procesos administrativos a la virtualidad. Adaptation to virtuality of healthcare services in their administrative processes.
11784340467	1	2	3	4	5	1	4	1		0	Actores claves desde Sociedad Civil	6		2	1	4	1	2	3	4	5							Restricciones en la movilidad transporte y la poca atencion en las clinicas terapia antirretroviral, pata pacientes de priemer ingreso y seguimiento. Transport mobility restrictions and little attention at clinics, antiretroviral therapy for new inpatients and subsequent follow-up.					Si. Las clinicas no estan funcionando de manera adecuada, la atencion no se da, solo se esta entregando recetas para retirar los ARV. Ninguna otra atencio. Al menos que se de urgencia y es canalozado para cuarto de urgencia. Yes. Clinics are not functioning adequately, care is not provided, only prescriptions are being handed out (for patients) to collect the antiretrovirals. No other care servic…	3		3		4		Brindar servicios personalizados para entrega de los ARV domiciliar y que se puedan buscar estrategias para brindar la atencion. Linea de apoyo y hasta atencion virtual. A parte de apoyo economico para garantizar alimentacion y medicinas, ya qie muchos han quedaso sin trabajos porq eran informales. Y ni hablar de la cantidad de personas extranjwras q ya estaban dentro del sistema y que vivian del…
11747880658	1	2	3	4	5	1	1	2		0	Sociedad civil. Civil society.	5		2	5	4	1	2	3	4			7		9		Suspensión de horas relacionadas a exámenes y atención médica (excepto embarazadas, ingresos y urgencias). Sólo se hace entrega de medicación. Cancellation of time related to medical care consultation (except for pregnant, admitted and emergencies). Only medication supply is performed.	Restricciones de movilidad, sólo hay que sacar un permiso temporal. Respecto a la reducción de transporte, ha impactado en sectores rurales y suburbanos, sobretodo en las regiones no capital. Mobility restrictions, only requirement is to obtain a temporary license. Regarding the reduction in transport, it has impacted rural and suburban sectors, mainly in non-capital regions.		2	3		Se han suspendido las horas clínicas y de exámenes. En algunos centros, se hace entrega de medicación por dos meses, pero no es universal. Clinical and exams time has been suspended. In some centres enough medication is supplied for two months but this is not universal.	4	No se están tomando los test de forma habitual, pasando a llevar una garantía de salud. Tests are not being performed as a routine but a health guarantee is being carried instead.	1		5		Entrega de medicación por 3 meses o más, entrega a domicilio (para evitar contagio cruzado), test de VIH aplicados por la sociedad civil. Medication for 3 months or longer could be supplied, home-delivered (to avoid cross-infections), HIV tests for civil society.
11646754086	1	2	3	4	5	1	5	2		2		8		2	2	4	1	2	3	4	5	6	7	8				restricción de servicios para pacientes con VIH. Restriction of services to HIV patients.		2	3			4		3		3		Descentralización de los servicios para facilitar el acceso a los servicios. Mayor colaboración con instituciones académicas. Decentralization of services to facilitate access to them. Greater collaboration with academic institutions.

[truncated: 6 more sheets: 11, 12, 13, 14, 15, blank]
